# Supplementary material for: Factors Influencing People's Response Toward Tiger Translocation in Satkosia Tiger Reserve, Eastern India
Source: Frontiers journal article supplement (doi:10.3389/fcosc.2021.664897), 2021-06-07
Supplement: Data_Sheet_2.xlsx [file Data_Sheet_2.xlsx]

## Sheet: Table 1
Data Sheet 2 Table 1: Pairwise correlation coefficient values for variables at household level.
	FAM	GEN	OCC	AGE	EDU	EWBI	SCH	FECO	WECO	RDI	IDI	CONSFOR	CONSWILD	LPG	LOSS	FHUM	FLIV	FFOR	FVIL	CONSTIGER	COMP	SATS	COOP	REST
FAM	1
GEN	-0.047	1
OCC	0.006	-0.288	1
AGE	0.057	-0.213	0.063	1
EDU	-0.019	-0.217	0.238	-0.219	1
EWBI	0.137	-0.033	0.212	0.03	0.141	1
SCH	0.163	0.006	0.029	0.116	0.004	0.236	1
FECO	0.071	0.106	-0.001	-0.037	-0.022	0.23	0.042	1
WECO	0.047	0.117	-0.014	-0.023	-0.06	0.082	-0.113	0.468	1
RDI	0.075	0.122	-0.053	-0.006	-0.077	0.053	-0.082	0.437	0.36	1
IDI	-0.039	0.003	0.164	0.009	0.008	0.058	0.058	0.149	0.093	0.1	1
CONSFOR	0.014	-0.038	0.063	0.006	0.028	0.1	0.062	0.244	0.123	0.029	0.051	1
CONSWILD	0.059	0.077	-0.003	0.025	0.02	0.146	0.087	0.377	0.288	0.288	0.117	0.282	1
LPG	0.015	-0.023	0.035	0.024	0.086	0.216	0.231	0.234	0.11	0.102	0.121	0.066	0.187	1
LOSS	-0.088	-0.159	0.166	0.054	0.095	0.099	0.061	-0.089	-0.128	-0.089	0.065	0.017	-0.168	0.062	1
FHUM	0.028	0.044	-0.031	-0.039	-0.002	0.002	0.042	-0.027	0.069	0.03	0.016	-0.003	-0.048	-0.008	0.166	1
FLIV	-0.019	0.027	0.036	0.017	-0.013	0.023	-0.008	0.081	0.084	0.062	0.038	0.062	-0.019	0.095	0.237	0.144	1
FFOR	-0.007	0.059	0.035	0.023	-0.029	-0.011	-0.133	0.135	0.247	0.158	0.09	0.071	0.137	0.121	0.121	0.064	0.417	1
FVIL	0.042	0.047	0.001	0.006	-0.025	0.005	-0.03	0.246	0.306	0.125	0.09	0.111	0.172	0.192	0.022	0.101	0.5	0.647	1
CONSTIGER	-0.022	0.083	-0.034	-0.072	-0.025	0.065	-0.056	0.094	0.019	0.163	0.017	-0.082	-0.042	0.102	-0.064	-0.006	-0.027	-0.049	-0.083	1
COMP	-0.039	0.028	-0.001	0.015	-0.078	-0.081	-0.184	-0.064	0.108	0.049	0.111	-0.094	-0.054	-0.12	-0.089	-0.022	0.061	0.216	0.202	0.024	1
SATS	0.003	0.026	-0.01	-0.007	0.003	-0.011	-0.035	-0.062	0.026	-0.085	-0.031	0.028	-0.021	0.006	-0.079	-0.033	-0.032	-0.001	0.046	0.014	0.145	1
COOP	0.004	0.075	-0.039	-0.011	-0.089	0.011	-0.158	0.244	0.219	0.249	0.046	-0.04	0.06	-0.067	-0.246	-0.185	-0.067	0.006	-0.077	0.044	0.295	0.054	1
REST	0.023	-0.01	-0.023	0.076	-0.077	-0.057	0.095	-0.104	-0.13	-0.247	-0.054	0.007	0	-0.084	-0.191	-0.066	0	-0.034	-0.004	-0.2	0.114	0.031	0.226	1

## Sheet: Table 2
Data Sheet 2 Table 2: Pairwise p-values for correlation test for variables at household level.
	FAM	GEN	OCC	AGE	EDU	EWBI	SCH	FECO	WECO	RDI	IDI	CONSFOR	CONSWILD	LPG	LOSS	FHUM	FLIV	FFOR	FVIL	CONSTIGER	COMP	SATS	COOP	REST
FAM	NA
GEN	0.039	NA
OCC	0.828	0	NA
AGE	0.012	0	0.013	NA
EDU	0.411	0	0	0	NA
EWBI	0	0.153	0	0.187	0	NA
SCH	0	0.801	0.248	0	0.874	0	NA
FECO	0.002	0	0.953	0.106	0.324	0	0.064	NA
WECO	0.041	0	0.593	0.314	0.008	0	0	0	NA
RDI	0.001	0	0.037	0.793	0.001	0.019	0	0	0	NA
IDI	0.091	0.907	0	0.687	0.71	0.011	0.011	0	0	0	NA
CONSFOR	0.537	0.099	0.015	0.796	0.238	0	0.008	0	0	0.22	0.029	NA
CONSWILD	0.012	0.001	0.908	0.3	0.4	0	0	0	0	0	0	0	NA
LPG	0.519	0.319	0.167	0.288	0	0	0	0	0	0	0	0.005	0	NA
LOSS	0	0	0	0.019	0	0	0.007	0	0	0	0.004	0.467	0	0.007	NA
FHUM	0.223	0.054	0.221	0.085	0.945	0.915	0.062	0.237	0.002	0.184	0.482	0.901	0.042	0.718	0	NA
FLIV	0.409	0.238	0.158	0.457	0.553	0.313	0.714	0	0	0.006	0.096	0.008	0.422	0	0	0	NA
FFOR	0.762	0.009	0.167	0.314	0.197	0.643	0	0	0	0	0	0.002	0	0	0	0.005	0	NA
FVIL	0.064	0.038	0.982	0.81	0.271	0.842	0.192	0	0	0	0	0	0	0	0.328	0	0	0	NA
CONSTIGER	0.358	0	0.197	0.003	0.296	0.007	0.02	0	0.424	0	0.486	0.001	0.087	0	0.008	0.817	0.268	0.042	0.001	NA
COMP	0.156	0.306	0.985	0.578	0.005	0.003	0	0.022	0	0.078	0	0.001	0.06	0	0.001	0.428	0.027	0	0	0.398	NA
SATS	0.912	0.39	0.747	0.82	0.906	0.7	0.233	0.035	0.382	0.004	0.296	0.364	0.503	0.848	0.008	0.261	0.277	0.975	0.117	0.655	0	NA
COOP	0.872	0.002	0.139	0.648	0	0.643	0	0	0	0	0.06	0.106	0.017	0.006	0	0	0.006	0.801	0.002	0.078	0	0.08	NA
REST	0.354	0.68	0.405	0.002	0.002	0.023	0	0	0	0	0.03	0.792	0.997	0.001	0	0.008	0.993	0.17	0.872	0	0	0.321	0	NA

## Sheet: Table 3
Data Sheet 2 Table 3: Pairwise correlation coefficient values for variables at village level.
	LIT	WORK	ELEC	LPG	DIST	CONSFOR	CONSWILD	CONSTIGER	SCHE	FHUM	FFOR	FVIL	RDI	IDI	FDI	VEDI	BPL	FLIV	COOP	REST	COMP	SATS	FECO	WECO	LOSS
LIT	1
WORK	-0.0794832	1
ELEC	-0.0429437	0.407411	1
LPG	0.0124482	0.560052	0.353852	1
DIST	0.153509	0.168269	0.0919771	0.246502	1
CONSFOR	0.16012	0.0121846	0.238353	0.104726	0.0342248	1
CONSWILD	0.217356	0.391769	0.461849	0.465112	0.251186	0.317966	1
CONSTIGER	-0.0237402	0.284807	0.322818	0.452383	0.153881	0.0106976	0.450561	1
SCHE	0.301919	0.239317	0.219292	0.386183	0.434869	0.196732	0.164937	-0.00366744	1
FHUM	0.190852	0.12064	0.103414	0.0836936	0.0428219	0.211129	-0.0520137	-0.239511	0.108772	1
FFOR	-0.0982988	0.369169	0.153139	0.283047	-0.0912689	0.010185	0.249283	0.214766	-0.234799	0.348459	1
FVIL	-0.148307	0.393509	0.0932859	0.399353	0.0732454	0.041032	0.256698	0.126856	0.0105893	0.437388	0.741608	1
RDI	-0.134154	0.418927	0.352189	0.404736	0.210373	-0.300103	0.394257	0.431877	-0.243531	-0.0102246	0.437066	0.229501	1
IDI	-0.235814	0.350436	0.102033	0.183899	0.410942	-0.175348	0.0726572	0.267237	0.0688306	0.0657151	0.172128	0.205761	0.312626	1
FDI	-0.148145	0.43303	0.355824	0.396762	0.21577	-0.313738	0.381909	0.413891	-0.234114	-0.00685504	0.434016	0.242448	0.995089	0.355809	1
VEDI	0.0492577	0.419293	0.0750427	0.410068	0.214681	-0.0379687	0.185864	0.313861	0.268843	-0.0833241	0.281691	0.23574	0.241538	0.227956	0.234198	1
BPL	-0.439912	-0.00902272	-0.226298	-0.139484	-0.080442	-0.1924	-0.132601	0.00937029	-0.621322	-0.0681361	-0.0351519	0.0130039	0.275851	0.204652	0.28297	-0.136581	1
FLIV	0.187657	0.127637	0.106251	0.0937174	0.0528312	0.201818	-0.0506041	-0.23521	0.127964	0.998254	0.336478	0.440919	-0.0109054	0.0809593	-0.00704387	-0.0889985	-0.0771365	1
COOP	-0.319906	0.445553	0.266657	0.238781	0.276598	-0.160818	0.156431	0.350051	-0.227551	-0.0981665	0.31601	0.148623	0.547217	0.451046	0.545465	0.18111	0.303744	-0.0942569	1
REST	-0.164941	0.070659	0.206058	0.2336	0.25955	-0.0924646	0.0764128	-0.0313623	0.19687	0.0622633	0.0953505	0.224092	0.0667498	0.147075	0.0806305	-0.132235	-0.0626591	0.0693067	0.324195	1
COMP	-0.257218	0.0211015	-0.0373562	0.128667	0.0728326	-0.392432	-0.146639	0.134951	-0.225893	0.0487827	0.254516	0.355066	0.192189	0.572598	0.212017	0.102078	0.304205	0.0573534	0.372777	0.240218	1
SATS	-0.0322275	-0.316146	-0.237917	-0.0644698	-0.0136139	0.292356	-0.10409	0.014455	-0.0442863	-0.0498802	0.0261377	0.032101	-0.296695	-0.0968583	-0.310322	0.0690871	-0.0170498	-0.0563172	0.032882	0.132939	0.186061	1
FECO	-0.206118	0.624721	0.350027	0.634521	0.24554	0.105662	0.507134	0.615192	0.0766206	0.131028	0.52767	0.544899	0.618454	0.359192	0.614591	0.503234	0.141426	0.13697	0.486115	0.051805	0.089395	-0.0884006	1
WECO	-0.432804	0.237327	0.0478949	0.216846	0.121172	-0.00766647	0.214736	0.306979	-0.353115	-0.298523	0.182051	0.223838	0.447901	0.248309	0.447498	-0.123455	0.535823	-0.296681	0.377448	0.0530257	0.171012	0.00733182	0.46061	1
LOSS	0.0994713	0.161561	0.284807	-0.0833894	0.109998	0.0650392	-0.250418	-0.244869	0.294946	0.377851	0.0967225	0.0392664	-0.0747762	0.156315	-0.0567684	0.0465722	-0.302803	0.375058	-0.1777	-0.0816705	0.130024	-0.176043	-0.157403	-0.269179	1

## Sheet: Table 4
Data Sheet 2 Table 4: Pairwise p-values for correlation test for variables at village level.
	LIT	WORK	ELEC	LPG	DIST	CONSFOR	CONSWILD	CONSTIGER	SCHE	FHUM	FFOR	FVIL	RDI	IDI	FDI	VEDI	BPL	FLIV	COOP	REST	COMP	SATS	FECO	WECO	LOSS
LIT	NA
WORK	0.6124	NA
ELEC	0.784524	0.00669597	NA
LPG	0.936853	9.41552e-05	0.0199194	NA
DIST	0.325704	0.280761	0.557467	0.111051	NA
CONSFOR	0.305045	0.938187	0.123754	0.503919	0.827524	NA
CONSWILD	0.161482	0.00937482	0.0018231	0.0016747	0.104211	0.0377212	NA
CONSTIGER	0.87989	0.0641531	0.0347402	0.00232137	0.324518	0.945719	0.00242999	NA
SCHE	0.0491069	0.122196	0.15769	0.0105326	0.00356665	0.20607	0.290533	0.981379	NA
FHUM	0.220226	0.440946	0.509303	0.593631	0.78512	0.174133	0.740455	0.121885	0.487488	NA
FFOR	0.530583	0.0148419	0.326885	0.0658882	0.560519	0.948316	0.10695	0.166661	0.129623	0.0220235	NA
FVIL	0.342559	0.00903735	0.55185	0.00797905	0.640659	0.793903	0.0965819	0.417582	0.946268	0.00335759	1.2765e-08	NA
RDI	0.391074	0.00517354	0.0205491	0.00710046	0.175714	0.050554	0.00889542	0.00382967	0.115561	0.948116	0.00338371	0.138757	NA
IDI	0.127927	0.0212317	0.515008	0.237813	0.00619253	0.26072	0.643351	0.0831997	0.660971	0.675452	0.269713	0.185596	0.0412415	NA
FDI	0.343092	0.00372636	0.0191931	0.00843426	0.16464	0.0404875	0.0114992	0.00579759	0.130779	0.965201	0.00363996	0.11724	0	0.0191986	NA
VEDI	0.753766	0.0051306	0.632463	0.006314	0.166833	0.808991	0.232748	0.0404043	0.0812942	0.595268	0.0672503	0.12805	0.118664	0.14151	0.130636	NA
BPL	0.00315898	0.954208	0.144506	0.372353	0.608104	0.216436	0.396633	0.952446	8.74167e-06	0.664189	0.822926	0.93404	0.073375	0.188029	0.0659647	0.38248	NA
FLIV	0.228192	0.414698	0.497689	0.550003	0.736521	0.19435	0.747255	0.128935	0.413496	0	0.027371	0.00308263	0.944666	0.605791	0.964243	0.570352	0.622969	NA
COOP	0.036505	0.00275192	0.0838965	0.12306	0.0725674	0.302914	0.316468	0.0213838	0.142237	0.531139	0.0389812	0.341522	0.000146266	0.00240062	0.000155116	0.245127	0.0476865	0.547699	NA
REST	0.290522	0.652529	0.184947	0.13165	0.0928077	0.555372	0.626244	0.841758	0.205746	0.691632	0.543042	0.148567	0.670629	0.346629	0.60726	0.397949	0.689769	0.658769	0.0339305	NA
COMP	0.0958856	0.893158	0.812016	0.410913	0.642548	0.00924492	0.348077	0.38824	0.145245	0.756068	0.0995497	0.0194697	0.21695	6.01312e-05	0.172286	0.514821	0.0473333	0.71488	0.0138207	0.120754	NA
SATS	0.837451	0.0388922	0.124463	0.681273	0.930953	0.0571171	0.506524	0.926699	0.777955	0.750754	0.867862	0.83808	0.053362	0.536653	0.0428405	0.659784	0.913586	0.71982	0.834195	0.395417	0.232244	NA
FECO	0.184816	7.54801e-06	0.0213935	4.89469e-06	0.112496	0.500093	0.00051916	1.13419e-05	0.625303	0.402305	0.000276688	0.000158074	9.88119e-06	0.0180047	1.16321e-05	0.000582481	0.365664	0.381114	0.00095014	0.741461	0.568629	0.572955	NA
WECO	0.00374637	0.125428	0.760375	0.162492	0.438917	0.961085	0.166721	0.0452506	0.0201966	0.0518407	0.242643	0.14904	0.00259662	0.108373	0.0026227	0.430277	0.000213092	0.0533735	0.0125878	0.735586	0.272879	0.962783	0.00188239	NA
LOSS	0.525668	0.300657	0.0641531	0.594979	0.482565	0.678609	0.10531	0.113514	0.0548508	0.0124861	0.537227	0.80259	0.633676	0.31683	0.717668	0.766805	0.048415	0.0132064	0.254278	0.602618	0.405952	0.258804	0.313431	0.0809002	NA
