# Supplementary material for: Factors Influencing People's Response Toward Tiger Translocation in Satkosia Tiger Reserve, Eastern India
Source: Frontiers journal article supplement (doi:10.3389/fcosc.2021.664897), 2021-06-07
Supplement: Data_Sheet_4.docx [file Data_Sheet_4.docx]

**Supplementary Data Sheet 4**

**Village clusters**

**
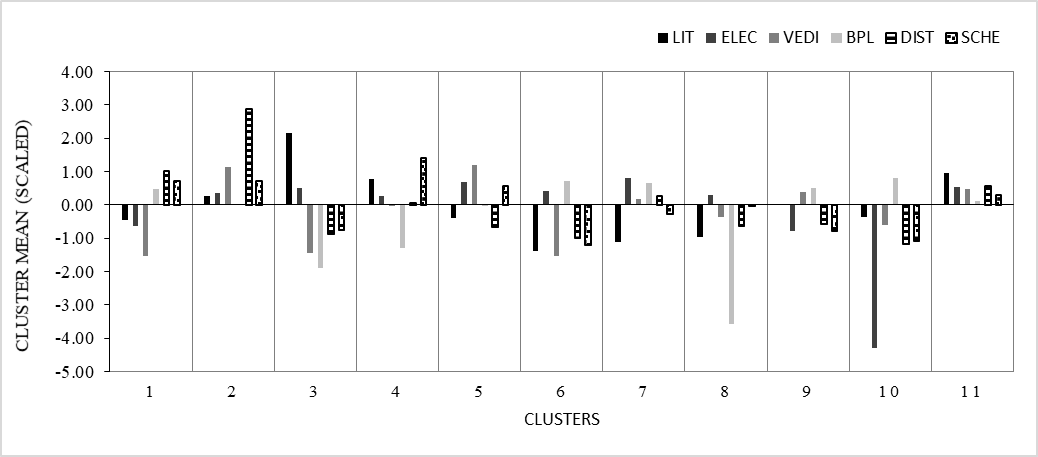
 Figure 1: Cluster Means for variables under ‘socio-economic’ category**

**
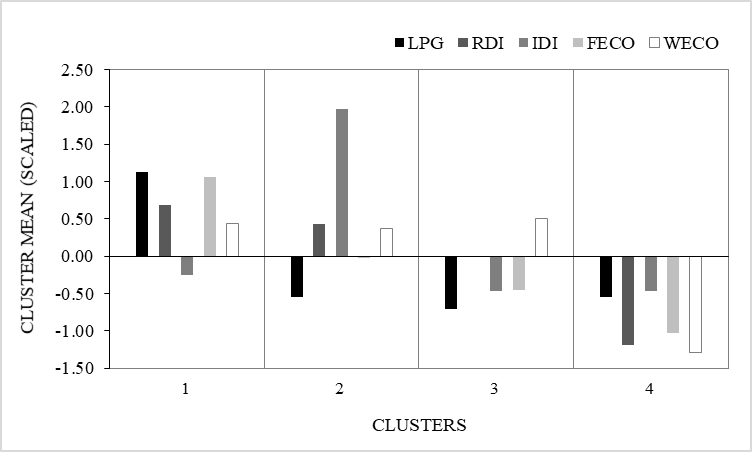
**

**Figure 2: Cluster Means for variables under ‘Ecosystem Values and Dependence’ category**

**
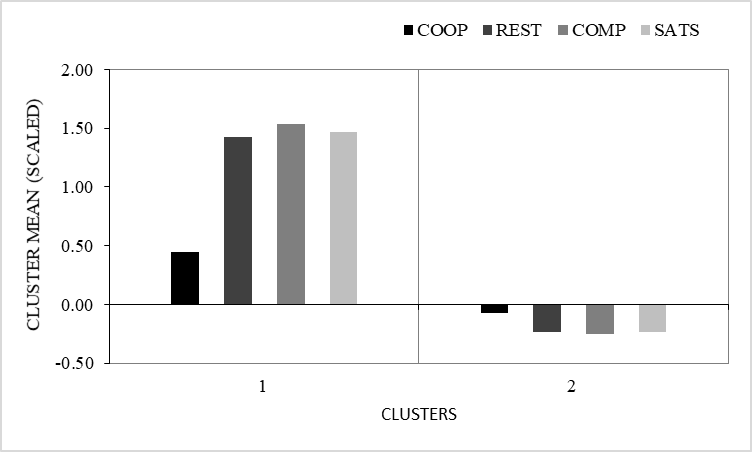
**

**Figure 3: Cluster Means for variables under ‘Relationship with Forest Department’ category**

**
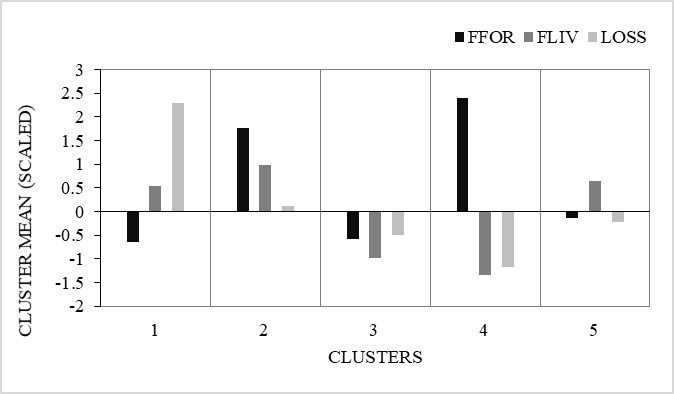
**

**Figure 4: Cluster Means for variables under ‘Fear and Losses’ category**

**
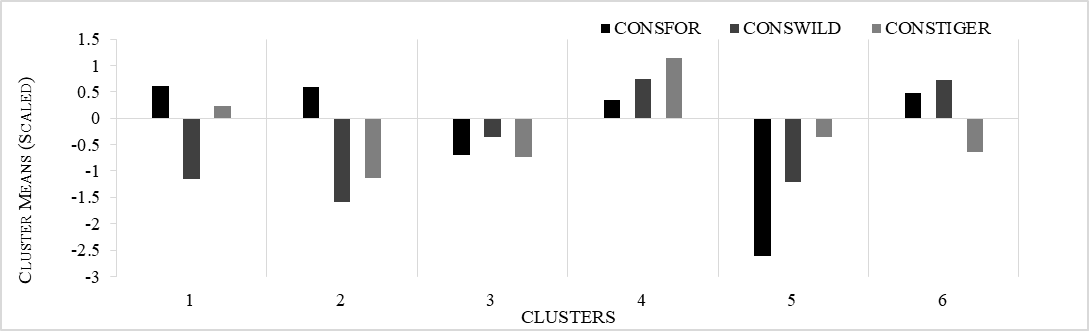
**

**Figure 5: Cluster Means for variables under ‘Attitude towards conservation’ category**
