# Supplementary material for: Factors Influencing People's Response Toward Tiger Translocation in Satkosia Tiger Reserve, Eastern India
Source: Frontiers journal article supplement (doi:10.3389/fcosc.2021.664897), 2021-06-07
Supplement: Table_1.docx [file Table_1.docx]

**Supplementary Table 1: Percentage sampling and village characteristics for the surveyed villages.** Percentage sampling calculated from Census 2011 data.Village population data was not available for hamlets or villages (indicated by NA) that settled after Census of 2011.

| **Village Name** | **Census (2011)** | | **Sampling** | | | |
| --- | --- | --- | --- | --- | --- | --- |
| Total Household | Total population | No of respondents | Percentage Sampling (Number of respondent/Total Households) | Village population (Respondent + Household members) | Mean household size |
| **Panchama** | 224 | 103 | 40 | 17.85 | 184 | 4.60 |
| **Kaintara** | 71 | 278 | 37 | 52.11 | 91 | 4.51 |
| **Katrang** | 72 | 278 | 61 | 84.72 | 227 | 3.72 |
| **Mandania** | 158 | 678 | 69 | 43.67 | 313 | 4.54 |
| **Baliput** | 75 | 314 | 37 | 49.33 | 96 | 4.51 |
| **Nuagan** | 86 | 325 | 37 | 43.02 | 148 | 4.00 |
| **Dudhianali** | 44* | 151 | 44 | 100.00 | 148 | 3.34 |
| **Hatibari** | 91 | 447 | 51 | 56.04 | 218 | 4.27 |
| **Tikarpada** | 210 | 751 | 70 | 33.33 | 306 | 4.35 |
| **Majhipada** | 58 | 246 | 19 | 32.75 | 100 | 5.26 |
| **Karadasingh** | 57 | 223 | 8 | 14.03 | 30 | 3.75 |
| **Nilamara** | 31* | 116 | 31 | 100.00 | 110 | 3.54 |
| **Daruha** | 26 | 113 | 20 | 76.92 | 84 | 4.10 |
| **Malisahi** | 65 | 241 | 50 | 76.92 | 196 | 3.92 |
| **Lokasingha** | NA | NA | 33 | NA | 170 | 5.20 |
| **Kadalibereni** | 97* | 434 | 97 | 100.00 | 467 | 4.83 |
| **Kaintasahi** | NA | NA | 25 | NA | 126 | 5.20 |
| **Chhotkei** | 119* | 450 | 119 | 100.00 | 511 | 4.57 |
| **Baghamunda** | 40* | 200 | 40 | 100.00 | 209 | 5.50 |
| **Bhurkundi** | 74* | 200 | 74 | 100.00 | 250 | 3.38 |
| **Tuluka** | 108 | 318 | 62 | 57.40 | 259 | 4.25 |
| **Nuapada** | 156 | 656 | 68 | 43.59 | 342 | 5.02 |
| **Nuagaon** | NA | NA | 55 | NA | 244 | 4.47 |
| **Hinjadoli** | 56* | 220 | 56 | 100.00 | 280 | 4.71 |
| **Hinjagola** | 67* | 287 | 67 | 100.00 | 284 | 4.24 |
| **Hinsaloi** | 17 | 58 | 12 | 70.59 | 56 | 4.67 |
| **Hinsrida** | 64 | 260 | 62 | 96.88 | 255 | 4.18 |
| **Kantabeda** | 133 | 579 | 67 | 50.38 | 311 | 4.64 |
| **Kumuri** | 101* | 432 | 101 | 100.00 | 392 | 3.61 |
| **Laimunda** | 33* | 134 | 33 | 100.00 | 147 | 4.45 |
| **Nuasahi** | NA | NA | 22 | NA | 94 | 4.27 |
| **Sankrida** | 32 | 179 | 30 | 93.75 | 171 | 5.18 |
| **Chikankhandi** | 85 | 386 | 45 | 52.94 | 197 | 4.38 |
| **Pampasar** | 49* | 179 | 49 | 100.00 | 142 | 2.93 |
| **Jokub** | 20 | 92 | 18 | 90.00 | 89 | 4.94 |
| **Baragotha** | 51 | 205 | 42 | 82.35 | 191 | 4.61 |
| **Asanbahal** | 29 | 146 | 22 | 75.86 | 159 | 7.22 |
| **Olaberi** | 37* | 172 | 37 | 100.00 | 197 | 5.32 |
| **Kamarasahi** | NA | NA | 50 | NA | 237 | 4.78 |
| **Tentulipada** | 19 | 97 | 18 | 94.73 | 76 | 4.50 |
| **Tentuli Taila** | NA | NA | 22 | NA | 101 | 4.63 |
| **Puruna Kantabeda** | 133 | 579 | 15 | 11.27 | 66 | 4.40 |
| **Labangi** | 17 | 57 | 14 | 82.35 | 54 | 3.86 |

*indicates the villages where number of households have increased since the last Census of 2011.
