# Supplementary material for: Factors Influencing People's Response Toward Tiger Translocation in Satkosia Tiger Reserve, Eastern India
Source: Frontiers journal article supplement (doi:10.3389/fcosc.2021.664897), 2021-06-07
Supplement: Table_2.docx [file Table_2.docx]

**Supplementary Table 2: Village clusters under five different categories of variables.** Membership of villages in cluster under each category indicated by numbers.

| Village ID | Village | Socio-economic | Ecosystem Values & Dependence | Relationship with Forest Department | Fear & Losses | Attitude towards Conservation |
| --- | --- | --- | --- | --- | --- | --- |
| Cluster Membership | | | | |
| 1 | Panchama | 11 | 1 | 2 | 3 | 4 |
| 2 | Kaintara | 7 | 1 | 2 | 5 | 6 |
| 3 | Katrang | 7 | 2 | 2 | 2 | 6 |
| 4 | Mandania | 7 | 1 | 2 | 3 | 3 |
| 5 | Baliput | 6 | 1 | 2 | 2 | 4 |
| 6 | Nuagan | 9 | 3 | 2 | 2 | 5 |
| 7 | Dudhianali | 4 | 4 | 2 | 1 | 2 |
| 8 | Hatibari | 4 | 4 | 2 | 3 | 6 |
| 9 | Tikarpada | 4 | 4 | 1 | 3 | 6 |
| 10 | Majhipada | 1 | 2 | 1 | 5 | 6 |
| 11 | Karadasingh | 3 | 4 | 2 | 1 | 6 |
| 12 | Nilamara | 4 | 4 | 2 | 1 | 2 |
| 13 | Daruha | 8 | 4 | 2 | 2 | 2 |
| 14 | Malisahi | 4 | 4 | 2 | 1 | 2 |
| 15 | Lokasingha | 9 | 3 | 2 | 3 | 4 |
| 16 | Kadalibereni | 11 | 1 | 2 | 5 | 6 |
| 17 | Kaintasahi | 9 | 4 | 2 | 5 | 6 |
| 18 | Chhotkei | 9 | 2 | 1 | 2 | 4 |
| 19 | Baghamunda | 9 | 4 | 2 | 3 | 5 |
| 20 | Bhurkundi | 11 | 2 | 2 | 2 | 3 |
| 21 | Tuluka | 2 | 2 | 2 | 3 | 4 |
| 22 | Nuapada | 9 | 4 | 2 | 3 | 5 |
| 23 | Nuagaon | 7 | 4 | 1 | 5 | 1 |
| 24 | Hinjadoli | 5 | 1 | 2 | 5 | 4 |
| 25 | Hinjagola | 11 | 1 | 2 | 5 | 4 |
| 26 | Hinsaloi | 7 | 1 | 2 | 3 | 4 |
| 27 | Hinsrida | 5 | 1 | 2 | 5 | 4 |
| 28 | Kantabeda | 5 | 1 | 2 | 5 | 4 |
| 29 | Kumuri | 5 | 1 | 2 | 5 | 4 |
| 30 | Laimunda | 2 | 1 | 2 | 5 | 4 |
| 31 | Nuasahi | 11 | 1 | 2 | 3 | 4 |
| 32 | Sankrida | 11 | 1 | 2 | 5 | 4 |
| 33 | Chikankhandi | 9 | 1 | 2 | 3 | 2 |
| 34 | Pampasar | 1 | 2 | 2 | 3 | 3 |
| 35 | Jokub | 1 | 3 | 2 | 3 | 3 |
| 36 | Baragotha | 9 | 3 | 2 | 2 | 6 |
| 37 | Asanbahal | 3 | 3 | 2 | 3 | 4 |
| 38 | Olaberi | 1 | 3 | 2 | 5 | 1 |
| 39 | Kamarasahi | 6 | 3 | 2 | 3 | 6 |
| 40 | Tentulipada | 9 | 3 | 2 | 3 | 3 |
| 41 | Tentuli Taila | 9 | 3 | 1 | 4 | 1 |
| 42 | Puruna Kantabeda | 10 | 3 | 2 | 3 | 5 |
| 43 | Labangi | 6 | 2 | 1 | 1 | 3 |
